# Supplementary material for: Prenatal Air Pollution Exposures, DNA Methyl Transferase Genotypes, and Associations with Newborn LINE1 and Alu Methylation and Childhood Blood Pressure and Carotid Intima-Media Thickness in the Children’s Health Study
Source: PubMed Central journal article supplement (PMC5132634; doi:10.1289/ehp181), 2016-05-24
Supplement: EHP181.s001.acco.pdf [file EHP181.s001.acco.pdf]

**Note to readers with disabilities:** *EHP* strives to ensure that all journal content is accessible to all readers. However, some figures and Supplemental Material published in *EHP* articles may not conform to [508 standards](#) due to the complexity of the information being presented. If you need assistance accessing journal content, please contact [ehp508@niehs.nih.gov](mailto:ehp508@niehs.nih.gov). Our staff will work with you to assess and meet your accessibility needs within 3 working days.

## **Supplemental Material**

### **Prenatal Air Pollution Exposures, DNA Methyl Transferase Genotypes, and Associations with Newborn LINE1 and Alu Methylation and Childhood Blood Pressure and Carotid Intima-Media Thickness in the Children's Health Study**

Carrie V. Breton, Jin Yao, Josh Millstein, Lu Gao, Kimberly D. Siegmund, Wendy Mack, Lora Whitfield-Maxwell, Fred Lurmann, Howard Hodis, Ed Avol, and Frank D. Gilliland

#### **Table of Contents**

**Table S1.** Spearman correlation between trimester-specific pollutants (N=392)

**Table S2.** The association between LINE1 (N=302) and AluYb8 (N=140) methylation % and a 2 SD change in air pollutants using a single multi-pollutant model, by trimester

**Table S3.** Association between a 1 % increase in LINE1 (N=411) and AluYb8 (N=190) methylation and CIMT and blood pressure

**Table S4.** SNPs and 1st trimester air pollutants showing joint effects on cardiovascular phenotypes

**Figure S1.** Boxplots of percent methylation for each assayed CpG in a) LINE1 (N=392) and b) AluYb8 (N=181). Boxes extend from the 25th to the 75th percentile, horizontal bars represent the median, whiskers extend 1.5 times the length of the interquartile range (IQR) above and below the 75th and 25<sup>th</sup> percentiles, respectively, and outliers beyond whiskers are represented as points.

**Figure S2.** Distributions of ambient air pollutants by trimester (N=392). Boxes extend from the 25th to the 75th percentile, horizontal bars represent the median, whiskers extend 1.5 times the length of the interquartile range (IQR) above and below the 75th and 25th percentiles, respectively, and outliers are represented as points.

**Figure S3.** Illustration of rs16999714 (yellow bar) upstream of the DNMT1 transcription start site in a putative enhancer that appears a) inactive in H1 BMP4 derived mesendoderm cells, b) active in H1 BMP4 derived trophoblast cells, and c) adjacent to a poised enhancer in H1 derived mesenchymal stem cells. Blue is H3K27ac and green is H3K4me1. The figure was produced using the Wash U Epigenome Browser.

## **Reference**

## **Additional Files**

### **Supplemental Code and Data Zip File**

#### **Supplemental Code and Data Zip File Index**

**Excel File S1.** List of 262 eligible SNPs analyzed

**Excel File S2.** Results for all SNP-1st trimester air pollutant interaction tests using a generalized linear regression model in which SNPs were treated as ordinal variables

**Table S1. Spearman correlation between trimester-specific pollutants (N=392)**

|    | T1                             |                  |                 |                | T2                             |                  |                 |                | T3                             |                  |                 |                |       |
|----|--------------------------------|------------------|-----------------|----------------|--------------------------------|------------------|-----------------|----------------|--------------------------------|------------------|-----------------|----------------|-------|
|    | PM <sub>2.5</sub> <sup>a</sup> | PM <sub>10</sub> | NO <sub>2</sub> | O <sub>3</sub> | PM <sub>2.5</sub> <sup>a</sup> | PM <sub>10</sub> | NO <sub>2</sub> | O <sub>3</sub> | PM <sub>2.5</sub> <sup>a</sup> | PM <sub>10</sub> | NO <sub>2</sub> | O <sub>3</sub> |       |
| T1 | PM <sub>2.5</sub>              | 1.00             | 0.66*           | 0.48*          | 0.41*                          | 0.19*            | 0.21*           | 0.27*          | 0.60*                          | -0.34*           | 0.39*           | -0.15          | 0.24* |
|    | PM <sub>10</sub>               |                  | 1.00            | 0.11           | 0.70*                          | 0.32*            | 0.30*           | 0.04           | 0.21*                          | -0.41*           | 0.21*           | 0.35*          | 0.39* |
|    | NO <sub>2</sub>                |                  |                 | 1.00           | 0.01                           | -0.07            | 0.42*           | 0.67*          | 0.56*                          | -0.15            | 0.38*           | 0.41*          | -0.12 |
|    | O <sub>3</sub>                 |                  |                 |                | 1.00                           | 0.61*            | 0.47*           | 0.22*          | 0.07                           | -0.44*           | 0.50*           | 0.20*          | 0.65* |
| T2 | PM <sub>2.5</sub>              |                  |                 |                | 1.00                           | 0.63*            | 0.39*           | 0.28*          | -0.11                          | 0.37*            | 0.05            | 0.56*          |       |
|    | PM <sub>10</sub>               |                  |                 |                |                                | 1.00             | -0.01           | 0.65*          | -0.01                          | 0.11             | -0.10           | 0.29*          |       |
|    | NO <sub>2</sub>                |                  |                 |                |                                |                  | 1.00            | 0.25*          | -0.14                          | 0.46*            | 0.60*           | 0.41*          |       |
|    | O <sub>3</sub>                 |                  |                 |                |                                |                  |                 | 1.00           | 0.31*                          | 0.39*            | 0.01            | 0.09           |       |
| T3 | PM <sub>2.5</sub>              |                  |                 |                |                                |                  |                 |                | 1.00                           | 0.58*            | 0.21*           | 0.46*          |       |
|    | PM <sub>10</sub>               |                  |                 |                |                                |                  |                 |                |                                | 1.00             | -0.03           | 0.71*          |       |
|    | NO <sub>2</sub>                |                  |                 |                |                                |                  |                 |                |                                |                  | 1.00            | -0.12          |       |
|    | O <sub>3</sub>                 |                  |                 |                |                                |                  |                 |                |                                |                  |                 | 1.00           |       |

<sup>a</sup>N=302

\*p<0.05

**Table S2. The association between LINE1 (N=302) and AluYb8 (N=140) methylation % and a 2 SD change in air pollutants using a single multi-pollutant model, by trimester**

| Pollutant            | LINE1                          |         | AluYb8 (high vs low)    |         |
|----------------------|--------------------------------|---------|-------------------------|---------|
|                      | Estimate <sup>a</sup> (95% CI) | P-value | OR <sup>a</sup> (95%CI) | P-value |
| <b>1st trimester</b> |                                |         |                         |         |
| PM <sub>2.5</sub>    | 0.60 (-0.53, 1.73)             | 0.30    | 0.43 (0.13, 1.42)       | 0.16    |
| PM <sub>10</sub>     | -0.92 (-2.00, 0.15)            | 0.09    | 2.03 (0.66, 6.30)       | 0.21    |
| NO <sub>2</sub>      | -0.85 (-1.81, 0.12)            | 0.08    | 2.48 (0.90, 6.89)       | 0.08    |
| O <sub>3</sub>       | -0.52 (-1.35, 0.31)            | 0.22    | 0.85 (0.37, 1.95)       | 0.69    |
| <b>2nd trimester</b> |                                |         |                         |         |
| PM <sub>2.5</sub>    | 0.18 (-0.92, 1.29)             | 0.74    | 0.33 (0.09, 1.12)       | 0.07    |
| PM <sub>10</sub>     | -0.86 (-1.99, 0.26)            | 0.13    | 1.81 (0.51, 6.36)       | 0.35    |
| NO <sub>2</sub>      | -0.32 (-1.42, 0.77)            | 0.56    | 2.49 (0.73, 8.50)       | 0.14    |
| O <sub>3</sub>       | 0.94 (0.08, 1.80)              | 0.03    | 1.00 (0.41, 2.46)       | 1.00    |
| <b>3rd trimester</b> |                                |         |                         |         |
| PM <sub>2.5</sub>    | 0.13 (-0.86, 1.13)             | 0.79    | 0.84 (0.30, 2.39)       | 0.75    |
| PM <sub>10</sub>     | -0.50 (-1.52, 0.53)            | 0.34    | 1.04 (0.38, 2.83)       | 0.94    |
| NO <sub>2</sub>      | 0.51 (-0.59, 1.60)             | 0.36    | 1.04 (0.32, 3.35)       | 0.95    |
| O <sub>3</sub>       | 1.06 (0.16, 1.95)              | 0.02    | 0.98 (0.41, 2.39)       | 0.97    |

<sup>a</sup> Models were adjusted for admixture, sex, plate, *in utero* tobacco smoke (LINE1 only) and maternal education level. The 2SD for the following 1st trimester pollutants PM<sub>2.5</sub>, PM<sub>10</sub>, NO<sub>2</sub>, and O<sub>3</sub> are 14 µg/m<sup>3</sup>, 32 µg/m<sup>3</sup>, 21 ppb, and 44 ppb, respectively. The 2SD for the following 2nd trimester pollutants PM<sub>2.5</sub>, PM<sub>10</sub>, NO<sub>2</sub>, and O<sub>3</sub> are 15 µg/m<sup>3</sup>, 33 µg/m<sup>3</sup>, 21 ppb, and 43 ppb, respectively. The 2SD for the following 3rd trimester pollutants PM<sub>2.5</sub>, PM<sub>10</sub>, NO<sub>2</sub>, and O<sub>3</sub> are 12 µg/m<sup>3</sup>, 30 µg/m<sup>3</sup>, 21 ppb, and 39 ppb, respectively.

**Table S3. Association between a 1 % increase in LINE1 (N=411) or AluYb8 (N=190) methylation and CIMT and blood pressure**

| Outcome                         | LINE1                     |         | AluYb8                    |         | p-value |
|---------------------------------|---------------------------|---------|---------------------------|---------|---------|
|                                 | $\beta^a$ (95% CI)        | p-value | $\beta^a$ (95% CI)        | p-value |         |
| Right CIMT (mm)                 | 0.0004 (-0.0011, 0.0018)  | 0.63    | 0.0003 (-0.0031, 0.0038)  | 0.85    |         |
| Left CIMT (mm)                  | 0.0007 (-0.0009, 0.0023)  | 0.38    | -0.0009 (-0.0046, 0.0028) | 0.65    |         |
| Diastolic blood pressure (mmHg) | -0.0407 (-0.2502, 0.1688) | 0.70    | -0.0676 (-0.5622, 0.4270) | 0.79    |         |
| Systolic blood pressure (mmHg)  | -0.1259 (-0.4071, 0.1553) | 0.38    | -0.2164 (-0.8265, 0.3937) | 0.49    |         |

<sup>a</sup>adjusted for sex, batch, age at CIMT, maternal smoking (LINE 1 only), maternal education and race/ethnicity

**Table S4. SNPs and 1st trimester air pollutants showing joint effects on cardiovascular phenotypes<sup>a</sup>**

| Gene ±<br>20kb                   | RS Number  | Chr | Location | Pollutant         | CVD phenotype                    | P-<br>value <sub>int</sub> | N   |
|----------------------------------|------------|-----|----------|-------------------|----------------------------------|----------------------------|-----|
| DNMT1                            | rs16999714 | 19  | 10177450 | NO <sub>2</sub>   | Systolic Blood Pressure (mmHg )  | 0.17                       | 388 |
|                                  |            |     |          |                   | Diastolic Blood Pressure (mmHg ) | 0.69                       | 388 |
|                                  |            |     |          |                   | Right CIMT (mm)                  | 0.83                       | 388 |
|                                  |            |     |          |                   | Left CIMT (mm)                   | 0.31                       | 388 |
|                                  |            |     |          |                   | DNMT1                            | rs16999714                 | 19  |
| Diastolic Blood Pressure (mmHg ) | 0.60       | 388 |          |                   |                                  |                            |     |
| Right CIMT (mm)                  | 0.04       | 388 |          |                   |                                  |                            |     |
| Left CIMT (mm)                   | 0.24       | 388 |          |                   |                                  |                            |     |
| DNMT1                            | rs16999714 | 19  | 10177450 | PM <sub>10</sub>  |                                  |                            |     |
|                                  |            |     |          |                   | Diastolic Blood Pressure (mmHg ) | 0.21                       | 388 |
|                                  |            |     |          |                   | Right CIMT (mm)                  | 0.68                       | 388 |
|                                  |            |     |          |                   | Left CIMT (mm)                   | 0.41                       | 388 |
|                                  |            |     |          |                   | DNMT1                            | rs16999714                 | 19  |
| Diastolic Blood Pressure (mmHg ) | 0.45       | 298 |          |                   |                                  |                            |     |
| Right CIMT (mm)                  | 0.45       | 298 |          |                   |                                  |                            |     |
| Left CIMT (mm)                   | 0.14       | 298 |          |                   |                                  |                            |     |
| DNMT3B                           | rs17123673 | 20  | 30873266 | PM <sub>2.5</sub> |                                  |                            |     |
|                                  |            |     |          |                   | Diastolic Blood Pressure (mmHg ) | 0.92                       | 302 |
|                                  |            |     |          |                   | Right CIMT (mm)                  | 0.78                       | 302 |
|                                  |            |     |          |                   | Left CIMT (mm)                   | 0.68                       | 302 |
|                                  |            |     |          |                   | DNMT3B                           | rs20654                    | 20  |
| Diastolic Blood Pressure (mmHg ) | 0.77       | 298 |          |                   |                                  |                            |     |
| Right CIMT (mm)                  | 0.42       | 298 |          |                   |                                  |                            |     |
| Left CIMT (mm)                   | 0.85       | 298 |          |                   |                                  |                            |     |
| DNMT3B                           | rs6579038  | 20  | 30894431 | O <sub>3</sub>    |                                  |                            |     |

|        |           |    |           |                   | Pressure (mmHg )                 |      |     |
|--------|-----------|----|-----------|-------------------|----------------------------------|------|-----|
|        |           |    |           |                   | Diastolic Blood Pressure (mmHg ) | 0.09 | 390 |
|        |           |    |           |                   | Right CIMT (mm)                  | 0.81 | 390 |
|        |           |    |           |                   | Left CIMT (mm)                   | 0.29 | 390 |
| DNMT3B | rs6579038 | 20 | 30894431  | PM <sub>10</sub>  | Systolic Blood Pressure (mmHg )  | 0.10 | 390 |
|        |           |    |           |                   | Diastolic Blood Pressure (mmHg ) | 0.20 | 390 |
|        |           |    |           |                   | Right CIMT (mm)                  | 0.41 | 390 |
|        |           |    |           |                   | Left CIMT (mm)                   | 0.18 | 390 |
| DNMT3B | rs8121782 | 20 | 30893499  | PM <sub>10</sub>  | Systolic Blood Pressure (mmHg )  | 0.09 | 392 |
|        |           |    |           |                   | Diastolic Blood Pressure (mmHg ) | 0.19 | 392 |
|        |           |    |           |                   | Right CIMT (mm)                  | 0.38 | 392 |
|        |           |    |           |                   | Left CIMT (mm)                   | 0.14 | 392 |
| TDG    | rs3794240 | 12 | 102853671 | PM <sub>10</sub>  | Systolic Blood Pressure (mmHg )  | 0.94 | 385 |
|        |           |    |           |                   | Diastolic Blood Pressure (mmHg ) | 0.65 | 385 |
|        |           |    |           |                   | Right CIMT (mm)                  | 0.51 | 385 |
|        |           |    |           |                   | Left CIMT (mm)                   | 0.76 | 385 |
| TDG    | rs4135036 | 12 | 102883184 | PM <sub>2.5</sub> | Systolic Blood Pressure (mmHg )  | 0.08 | 302 |
|        |           |    |           |                   | Diastolic Blood Pressure (mmHg ) | 0.24 | 302 |
|        |           |    |           |                   | Right CIMT (mm)                  | 0.75 | 302 |
|        |           |    |           |                   | Left CIMT (mm)                   | 0.79 | 302 |
| TET2   | rs2726459 | 4  | 106404046 | PM <sub>2.5</sub> | Systolic Blood Pressure (mmHg )  | 0.51 | 301 |
|        |           |    |           |                   | Diastolic Blood Pressure (mmHg ) | 0.68 | 301 |
|        |           |    |           |                   | Right CIMT (mm)                  | 0.99 | 301 |
|        |           |    |           |                   | Left CIMT (mm)                   | 0.69 | 301 |
| TET2   | rs4698932 | 4  | 106268596 | PM <sub>2.5</sub> | Systolic Blood Pressure (mmHg )  | 0.33 | 265 |
|        |           |    |           |                   | Diastolic Blood Pressure (mmHg ) | 0.83 | 265 |
|        |           |    |           |                   | Right CIMT (mm)                  | 0.73 | 265 |
|        |           |    |           |                   | Left CIMT (mm)                   | 0.57 | 265 |
| TET2   | rs7655049 | 4  | 106271913 | PM <sub>2.5</sub> | Systolic Blood Pressure (mmHg )  | 0.55 | 299 |

|      |           |   |           |                   |                                  |      |     |
|------|-----------|---|-----------|-------------------|----------------------------------|------|-----|
|      |           |   |           |                   | Diastolic Blood Pressure (mmHg ) | 0.51 | 299 |
|      |           |   |           |                   | Right CIMT (mm)                  | 0.80 | 299 |
|      |           |   |           |                   | Left CIMT (mm)                   | 0.55 | 299 |
| TET2 | rs7678440 | 4 | 106398351 | PM <sub>2.5</sub> | Systolic Blood Pressure (mmHg )  | 0.68 | 302 |
|      |           |   |           |                   | Diastolic Blood Pressure (mmHg ) | 0.97 | 302 |
|      |           |   |           |                   | Right CIMT (mm)                  | 0.93 | 302 |
|      |           |   |           |                   | Left CIMT (mm)                   | 0.87 | 302 |

---

<sup>a</sup> SNPs were modeled as ordinal variables (in which 0= minor allele, 1= heterozygote, and 2= major allele) and models were adjusted for admixture, sex, plate, *in utero* tobacco smoke and maternal education level. Interaction p-values were generated with Wald's test. The 2SD for the following 1st trimester pollutants PM<sub>2.5</sub>, PM<sub>10</sub>, NO<sub>2</sub>, and O<sub>3</sub> are 14 µg/m<sup>3</sup>, 32 µg/m<sup>3</sup>, 21 ppb, and 44 ppb, respectively.



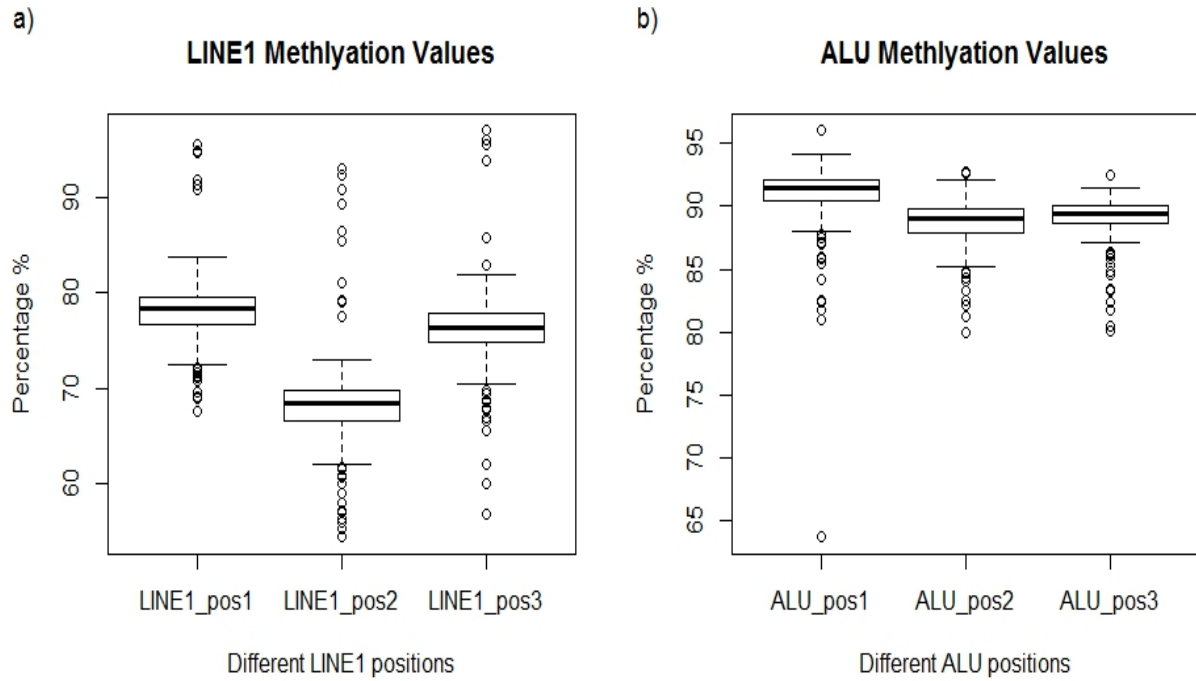

**Figure S1.** Boxplots of percent methylation for each assayed CpG in a) LINE1 (N=392) and b) AluYb8 (N=181). Boxes extend from the 25th to the 75th percentile, horizontal bars represent the median, whiskers extend 1.5 times the length of the interquartile range (IQR) above and below the 75th and 25<sup>th</sup> percentiles, respectively, and outliers beyond whiskers are represented as points.

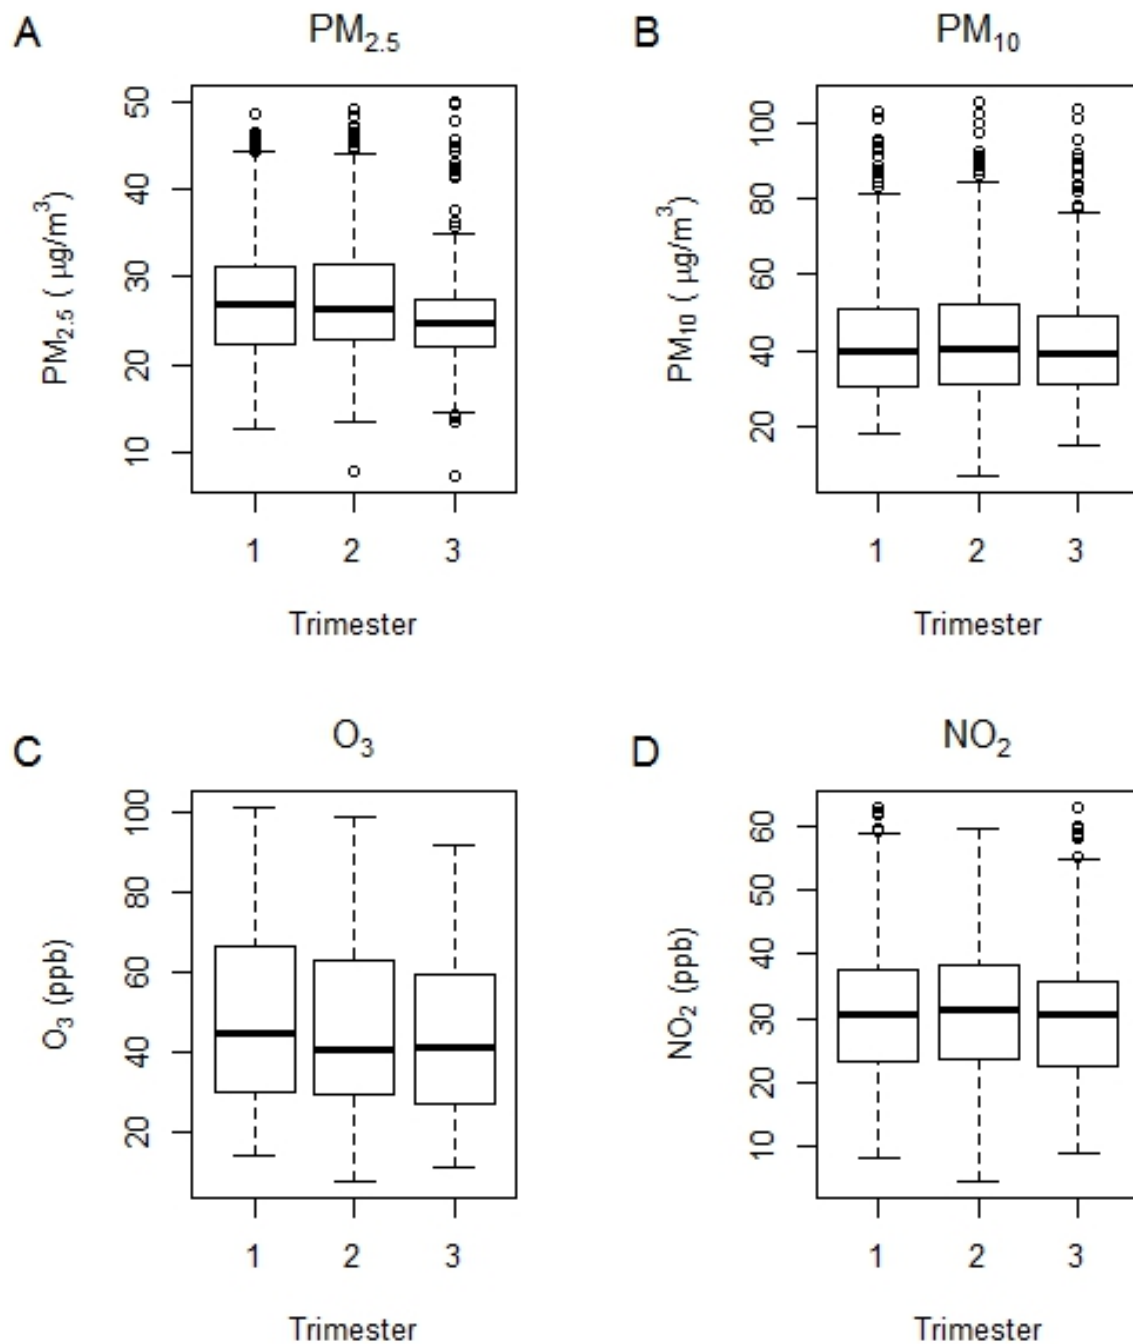

**Figure S2.** Distributions of ambient air pollutants by trimester (N=392). Boxes extend from the 25th to the 75th percentile, horizontal bars represent the median, whiskers extend 1.5 times the length of the interquartile range (IQR) above and below the 75th and 25th percentiles, respectively, and outliers are represented as points.

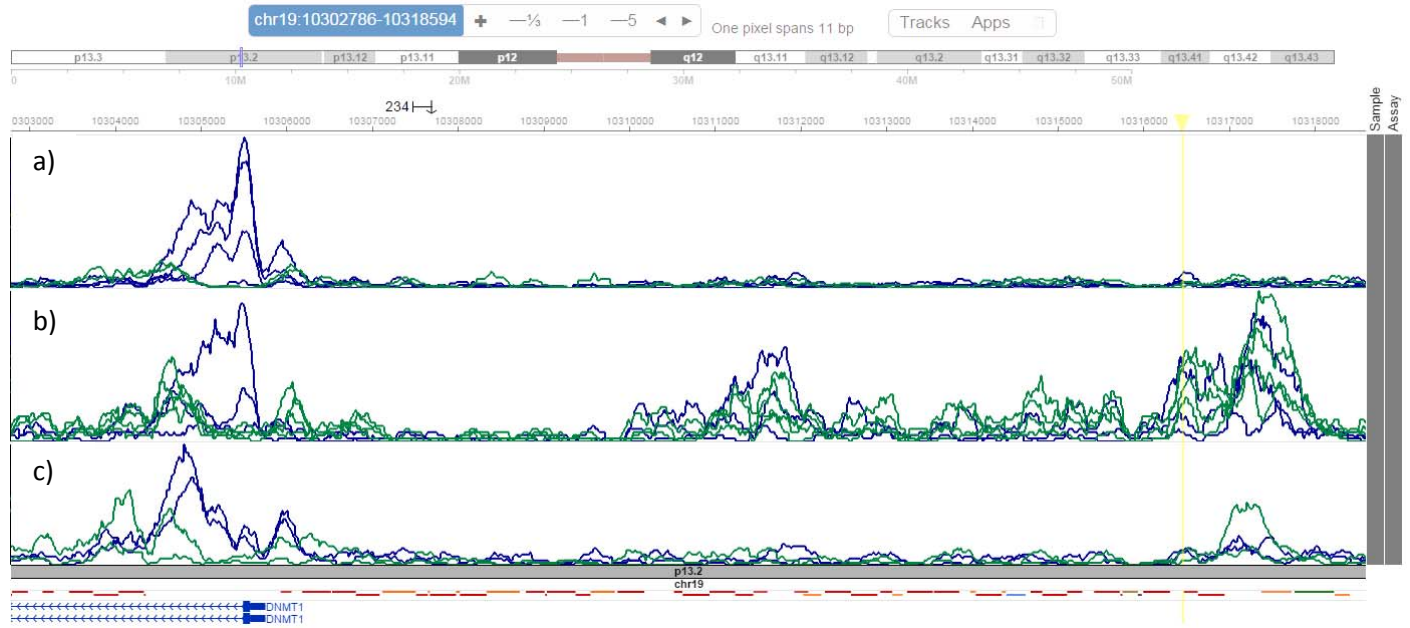

**Figure S3.** Illustration of rs16999714 (yellow bar) upstream of the DNMT1 transcription start site in a putative enhancer that appears a) inactive in H1 BMP4 derived mesendoderm cells, b) active in H1 BMP4 derived trophoblast cells, and c) adjacent to a poised enhancer in H1 derived mesenchymal stem cells. Blue is H3K27ac and green is H3K4me1. The figure was produced using the Wash U Epigenome Browser.<sup>1</sup>

## References

1. Zhou X, Maricque B, Xie M, Li D, Sundaram V, Martin EA, Koebbe BC, Nielsen C, Hirst M, Farnham P, Kuhn RM, Zhu J, Smirnov I, Kent WJ, Haussler D, Madden PA, Costello JF and Wang T. The Human Epigenome Browser at Washington University. *Nat Methods*. 2011;8:989-990.
